# Supplementary material
Source: PubMed Central journal article supplement (PMC3093511)
Supplement: 1105369108_pnas.201105369SI.pdf [file 1105369108_pnas.201105369SI.pdf]

# Supporting Information

Guo and Stark 10.1073/pnas.1105369108

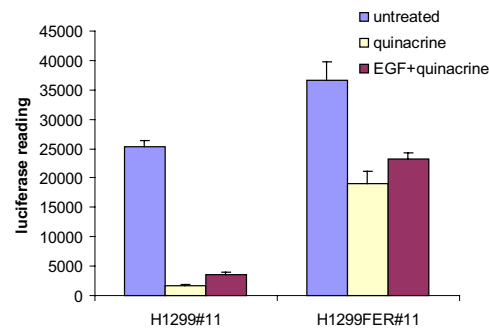

**Fig. S1.** Effect of EGF stimulation on quinacrine-mediated NF- $\kappa$ B activation. H1299#11 or H1299FER#11 cells were stimulated with EGF for 4 h. After removing the EGF, the cells were treated with quinacrine (7  $\mu$ M) for 16 h, and NF- $\kappa$ B activity was measured. The cell lysates were normalized by protein concentration. The results of triplicate luciferase assays are shown as means  $\pm$  SD.

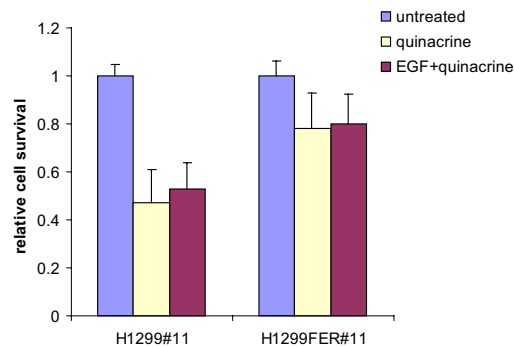

**Fig. S2.** Effect of EGF stimulation on quinacrine-mediated cell killing. H1299#11 or H1299FER#11 cells were stimulated with EGF for 4 h. After removing the EGF, the cells were treated with quinacrine (7  $\mu$ M) for 16 h, and cell survival was measured by the Cell Titer Blue method. Data shown represent means  $\pm$  SD from three experiments.
